# Supplementary material for: Synthesis of Bodipy-Tagged Galactoconjugates and Evaluation of Their Antibacterial Properties
Source: MDPI journal article supplement (doi:10.3390/molecules29102299), 2024-05-14
Supplement: s1 [file s1]

# Synthesis of Bodipy-tagged galactoconjugates and evaluation of their antibacterial properties

Chiara Maria Antonietta Gangemi, Maura Monforte, Antonino Arrigo, Paola Maria Bonaccorsi, Sabrina Conoci, Antonella Iaconis, Fausto Puntoriero, Domenico Franco\* and Anna Barattucci\*

*Dipartimento di Scienze Chimiche, Biologiche, Farmaceutiche ed Ambientali, Università degli Studi di Messina, V.le F. Stagno D'Alcontres 31, 98166 Messina, Italy*

## Electronic Supporting Information

### Table of Contents

|                            |         |
|----------------------------|---------|
| 1.General Information      | pg. S2  |
| 2.Experimental Section     | pg. S3  |
| 3.Characterization Data    | pg. S4  |
| 4.Fluorescence experiments | pg. S7  |
| 5.Biological data          | pg. S8  |
| 6.NMR Spectra of products  | pg. S12 |
| 7.References               | pg. S22 |

## 1. General Information

**Chemicals.** Solvents were purified according to standard procedures. All the syntheses were monitored by TLC on commercially available precoated plates (silica gel 60 F<sub>254</sub>), and the products were visualized with vanillin [1 g dissolved in MeOH (60 mL) and conc. H<sub>2</sub>SO<sub>4</sub> (0.6 mL)] and UV lamp. Silica gel 60 was used for column chromatography.

**Instrumentation.** Proton (<sup>1</sup>H) and carbon (<sup>13</sup>C) NMR spectra were recorded on a Varian 500 spectrometer (at 500 MHz for <sup>1</sup>H; and 125 MHz for <sup>13</sup>C) using CDCl<sub>3</sub> or acetone-*d*<sub>6</sub> as solvents. Chemical shifts are given in parts per million (ppm) (δ relative to residual CHCl<sub>3</sub> peak (7.26 ppm and 77.0 ppm) or acetone peak (2.05 ppm and 30.5 ppm) for <sup>1</sup>H and <sup>13</sup>C), coupling constants (J) are given in Hertz, and the attributions are supported by heteronuclear single-quantum coherence (HSQC) and correlation spectroscopy (COSY) experiments. Mass analysis for final products were performed with a TSQ-Quantum access Triple Quadrupole Mass Spectrometer (Thermo Fisher Scientific, Waltham, MA, USA), equipped with a HESI (Heated ElectroSpray Ionization) source; analyses were run in positive mode. Mass spectrometer parameters: sheath gas flow rate, 30 (arbitrary units); aux gas flow rate, 15 (arbitrary units); spray voltage, 5.00 kV; capillary temperature, 250 °C; tube lens voltage, 55 V; heater temperature, 270 °C; scan mode: full scan.

UV/vis absorption spectra were recorded with a Jasco V-560 spectrophotometer. The luminescence was investigated with a Jobin Yvon-Spex Fluoromax P spectrofluorometer equipped with a Hamamatsu R3896 photomultiplier. The emission spectra were corrected for the photomultiplier response taking advantage of a program purchased with the instrument. Luminescence lifetimes were calculated on data registered with a Edinburgh OB 900 time-correlated single-photon-counting spectrometer and a Hamamatsu PLP 2 laser diode (59 ps pulse width at 408 nm) as excitation pulse. Emission quantum yields were determined by the optically diluted method, by using as luminescence quantum yield standards, [Ru(bpy)<sub>3</sub>]<sup>2+</sup> (bpy = 2,2'-bipyridine), [3] and cresyl violet. [4]

**Bacterial strains, media, and growth conditions.** *Pseudomonas aeruginosa* (*P. aeruginosa*) ATCC27853 and *Staphylococcus aureus* (*S. aureus*) ATCC29213 were purchased from the American Type Culture Collection (LGC Promochem, Milan, Italy). Bacterial strains were chosen as representative of Gram-negative (*P. aeruginosa*) and -positive (*S. aureus*) pathogens associated with chronic infections. [5] *P. aeruginosa* was cultured in Miller's Luria Broth (LB, Condalab, Madrid, Spain), while *S. aureus* in Trypticasein Soy Broth (TSB, Condalab, Madrid, Spain). Both bacterial strains were maintained in their respective media supplemented with 20% glycerol at -80 °C.

**Antibacterial assay.** *in vitro* evaluating antimicrobial activity was performed by broth microdilution assay of which a brief description follows. For each strain, semi-exponential broth culture was prepared at a final concentration of about 10<sup>5</sup> bacteria/mL starting from 0.5 McFarland inoculum (~1.5×10<sup>8</sup> bacteria/mL). Bacterial suspensions were dispensed in 50 mL tubes and added with several concentrations of **GalTEBB-1** and **GalTEBB-2** (15.6, 31.25, 62.5, 125 and 250 µg/mL). Then, 150 µL from each experimental condition were distributed in 96-well plates and incubated at 37 °C overnight (18 h) dissolved in dimethylsulfoxide (DMSO) cell culture grade (A3672, ITW Reagents, Monza, Italy). DMSO was also evaluated at 0.78, 1.56, 3.12, 6.25 and 12.5% (w/v), representing proportional percentages present in the dilutions of **GalTEBB-1** and **GalTEBB-2** evaluated (**Table S1, ESI**). Bacterial growth under different experimental conditions was quantified by spectrophotometric reading at 540 nm (OD<sub>540</sub>) with a microtiter plate reader (Multiskan GO, Thermo Scientific, Waltham, MA-USA) by using the following formula (equ. 1):

$$\text{Normalized OD}_{540} = \frac{\text{OD}_{540} - \text{OD}_{540\text{blank}}}{\text{OD}_{540\text{blank}}}$$

where OD<sub>540nm</sub> blank is the experimental conditions without bacterial inoculum

Minimum inhibitory concentration (MIC) was evaluated by considering growth reduction over 90% with respect compared to the control condition without compounds (CTR+) using the following formula:

$$\text{bacterial growth (\%)} = \left( \frac{\text{normalized } OD_{540} \text{ Condition}}{\text{normalized } OD_{540} \text{ CTR} +} \right) \times 100$$

MIC = % bacterial inhibition > 90%

Starting from MIC endpoints, minimum bactericidal concentration (MBC) was determined by subculturing to growth media added with 2% American Bacteriological Agar (Condalab, Madrid, Spain) and defined as the lowest concentration of compound resulting in microbial death.

**Statistical analysis.** All experimental conditions were analysed in triplicate as mean  $\pm$  standard error (SE) and expressed as percentage versus control condition without compounds (CTR+). Differences among several conditions were evaluated by using one-way ANOVA analysis of variance followed by a Turkey post-hoc test for multiple comparisons. p-values lower than 0.05 were considered to be significant.

## 2. Experimental Section

**1,4-Diiodo-2,5-dimethoxybenzene (1).** A methanolic (20 mL) suspension of  $\text{H}_5\text{IO}_6$  (2.9 g, 12.8 mmol) was kept under stirring at rt for 10';  $\text{I}_2$  (6.4 g, 25.2 mmol) was then added and, after further 10' stirring, 2.70 g of 1,4-dimethoxybenzene (19.5 mmol) were added. The mixture was warmed at 70°C and kept under stirring for 4h. After cooling, a solution of  $\text{Na}_2\text{S}_2\text{O}_5$  (10% wt., 50 mL) was added and the obtained precipitate was filtered, washed with methanol and solubilized in DCM. The remaining precipitate was filtered, and evaporation of the mother liquors gave 6.8 g of **1** as white crystal. Yield 90%.

**2,5-diiodo-idroquinone (2).** 1,4-diiodo-2,5-dimethoxybenzene (**1**) (3.0 g, 7.7 mmol) was dissolved under argon atmosphere in 100 mL of dry DCM and the mixture was placed in an acetone/dry ice bath at -78°C. A solution of  $\text{BBr}_3$  1.0 M in DCM (32.7 mmol) was added and the temperature was brought to rt, under continuous stirring for 16h. After this time, the solution was added to a water/ice mixture, with the formation of a white solid. After filtration, 1.99 g (5.5 mmol) of 2,5-diiodo-hydroquinone **2** were obtained. Yield 71%.

**1,4-bis-O-trimethylsilyl-2,5-diiodo-idroquinone (3).** To an anhydrous  $\text{CH}_3\text{CN}$  (6 mL) solution of **2** (1.0 g, 2.7 mmol),  $\text{TMSCl}$  (0.66 g, 6.07 mmol) and 1,1,1,3,3,3-hexamethyldisilazane (0.99 g, 6.13 mmol) were added. The reaction mixture was left under continuous stirring and in argon atmosphere for 16h. The solvent was removed under vacuum, and the obtained solid was added to hexane (10 mL), leaving the inorganic salts undissolved. The organic phase was washed twice with  $\text{NaHCO}_3$  sat. and dried on  $\text{Na}_2\text{SO}_4$ . After solvent evaporation, 1.3 g (2.6 mmol) of **3** were obtained. Yield 94%.

**1,4-bis-(2,3,4,6-tetra-O-acetyl-D- $\beta$ -galactopyranosil)-2,5-diiodobenzene (4).** To a solution of  $\beta$ -D-galactose pentaacetate (2.1 g, 5.30 mmol) in anhydrous DCM (25 mL) a solution of 1,4-bis-O-trimethylsilyl-2,5-diiodo-idroquinone (**3**) (1.2 g, 2.4 mmol) in DCM (10 mL) and  $\text{BF}_3\text{Et}_2\text{O}$  (4.9 mL) were added. After 16h stirring at rt under argon atmosphere, the reaction was quenched with  $\text{NaHCO}_3$  sat. The organic phase was dried over  $\text{Na}_2\text{SO}_4$  and the solvent evaporated under vacuum. Compound **4** was obtained as pure white solid after crystallization from methanol of the crude product (1.4 g, 1.4 mmol). MP 183-185 °C. Yield 59%.

### Compound 6

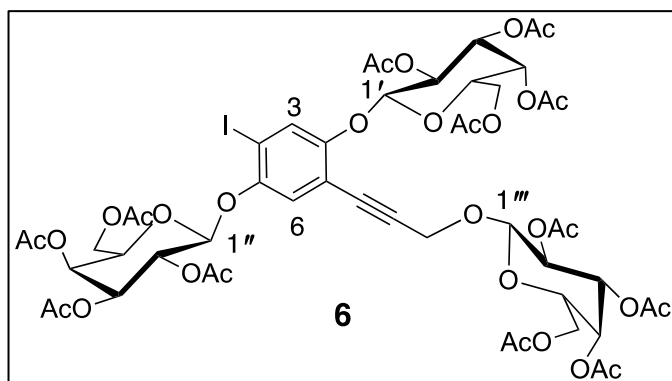

$^1\text{H}$  NMR (500 MHz,  $\text{CDCl}_3$ )  $\delta$ : 7.47 and 7.13 (2H, 2 x s, H-Ar), 5.57 and 5.51 (2H, 2 x dd,  $J_{1,2}$  = 8.0,  $J_{2,3}$  = 10.3, H-2', H-2''), 5.46-5.45 (2H, m, H-4', H-4''), 5.41-5.40 (1H, m, H-4'''), 5.21 (1H, dd,  $J_{1,2}$  = 8.2,  $J_{2,3}$  = 10.3, H-2'''), 5.14-5.10 (3H, m, H-3', H-3'', H-3'''), 4.97 and 4.95 (2H, 2 x d, H-1', H-1''), 4.77 (1H, d, H-1'''), 4.62 and 4.59 (2H, narrow AB system,  $J_{\text{gem}}$  = 15.7,  $\text{CH}_2\text{-C}\equiv\text{C}$ ), 4.31-4.02 (9H, m, H-5', H-5'', H-5''', H<sub>2</sub>-6', H<sub>2</sub>-6'', H<sub>2</sub>-6'''), 2.20, 2.18, 2.16, 2.13, 2.11, 2.10, 2.05, 2.04, 2.03, 2.02 and 1.98 (36H, 11 x s,  $\text{CH}_3\text{CO}$ ).

$^{13}\text{C}$  NMR (125 MHz,  $\text{CDCl}_3$ )  $\delta$ : 170.3, 170.2, 170.1, 170.0, 169.9, 169.2, 169.0, 162.4, 153.6, 151.5, 131.9, 131.8, 128.4, 128.3, 126.2, 120.0, 113.7, 100.3, 99.8, 99.2, 89.8, 87.8, 80.7, 71.3, 71.1, 70.6, 70.5, 70.4, 70.3, 68.7, 68.0, 67.9, 66.9, 66.8, 66.7, 61.7, 61.2, 61.1, 60.2, 57.0, 36.3, 31.2, 30.7, 21.1, 20.8, 20.7, 20.6, 20.5, 20.4, 20.3, 14.0. Anal. Calcd for  $\text{C}_{51}\text{H}_{61}\text{IO}_{30}$  (1280.92): C, 47.82; H, 4.80; Found: C, 47.76; H, 4.80.

### Compound 9

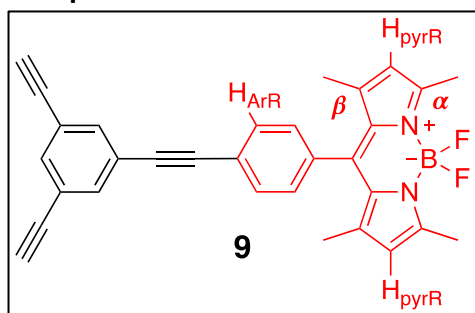

$^1\text{H}$  NMR (500 MHz,  $\text{CDCl}_3$ )  $\delta$ : 7.65 (4H, m, H<sub>Ar</sub>), 7.58 (1H, s, H<sub>Ar</sub>), 7.29 (2H, d,  $J_{\text{ortho}}$  = 8.4, H<sub>Ar</sub>), 5.99 (2H, s, H<sub>py</sub>), 3.13 (2H, s,  $\text{HC}\equiv$ ), 2.56 (s, 6H, 2xCH<sub>3</sub>), 1.42 (s, 6H, 2xCH<sub>3</sub>).  $^{13}\text{C}$  NMR (125 MHz,  $\text{CDCl}_3$ )  $\delta$ : 155.8, 143.0, 140.6, 135.5, 135.4, 135.1, 132.4, 131.2, 128.3, 123.6, 123.4, 123.0, 121.4, 89.9, 88.7, 81.7, 78.7 and 14.6. Anal. Calcd for  $\text{C}_{31}\text{H}_{23}\text{BF}_2\text{N}_2$  (472.35): C, 78.83; H, 4.91; N, 5.93; Found: C, 78.89; H, 4.92; N, 5.94.

### Compound 10

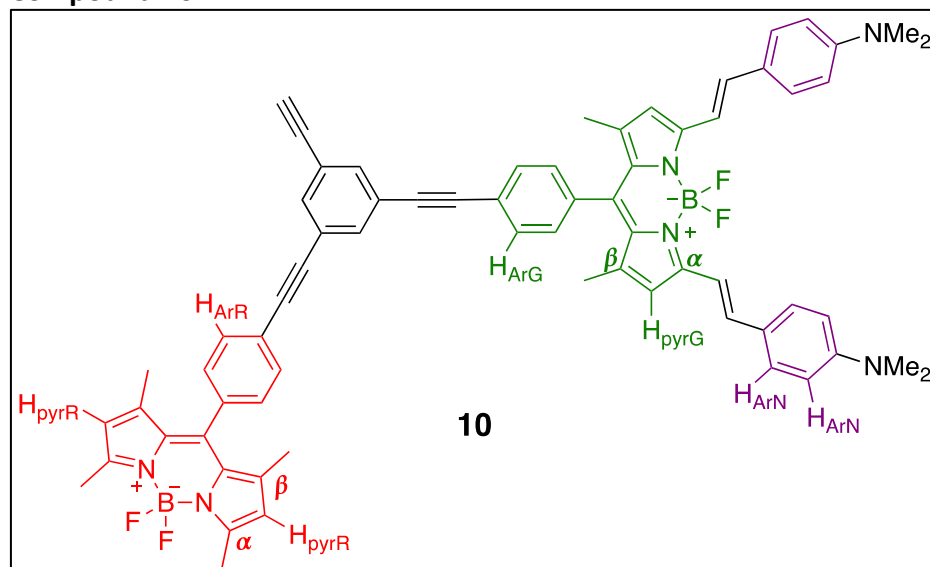

$^1\text{H}$  NMR (500 MHz,  $\text{CDCl}_3$ )  $\delta$ : 7.73-7.56 (12H, m, 3 x H<sub>Ar</sub>, 2 x H<sub>ArG</sub>, 4 x H<sub>ArN</sub>, 2xH<sub>ArR</sub> and  $\text{HC}\equiv$ ), 7.37 and 7.32 (4H, 2 x d,  $J_{\text{ortho}}$  = 7.8 and 7.9, 2 x H<sub>ArG</sub>, 2 x H<sub>ArR</sub>), 7.21 (2H, A part of an AB system,  $J_{\text{vic}}$  = 16.4, =CH), 6.72 (4H, d,  $J_{\text{ortho}}$  = 8.8, 4 x H<sub>ArN</sub>), 6.61 (2H, s, H<sub>pyrG</sub>), 6.00 (2H, s, H<sub>pyrR</sub>), 3.16 (1H, s,  $\text{HC}\equiv$ ), 3.04 (12H, s, 2 x N(CH<sub>3</sub>)<sub>2</sub>), 2.57 (6H, s, 2xCH<sub>3pyrR</sub>), 1.48 and 1.44 (12H, 2 x s, 2xCH<sub>3pyrG</sub>, 2xCH<sub>3pyrR</sub>).  $^{13}\text{C}$  NMR (125 MHz,

CDCl<sub>3</sub>)  $\delta$ : 155.8, 153.0, 150.9, 143.0, 140.6, 136.6, 136.3, 135.5, 134.9, 134.8, 134.6, 132.7, 132.4, 132.1, 131.2, 129.2, 129.1, 128.3, 125.1, 123.9, 123.7, 123.5, 123.1, 123.0, 121.4, 117.4, 114.9, 112.1, 90.3, 89.9, 88.9, 88.5, 81.8, 78.7, 40.3, 14.8, 14.6. Anal. Calcd for C<sub>68</sub>H<sub>58</sub>B<sub>2</sub>F<sub>4</sub>N<sub>6</sub> (1056,87): C, 77.28; H, 5.53; N, 7.95; Found: C, 76.98; H, 5.52; N, 7.93.

### GalTEBB-1

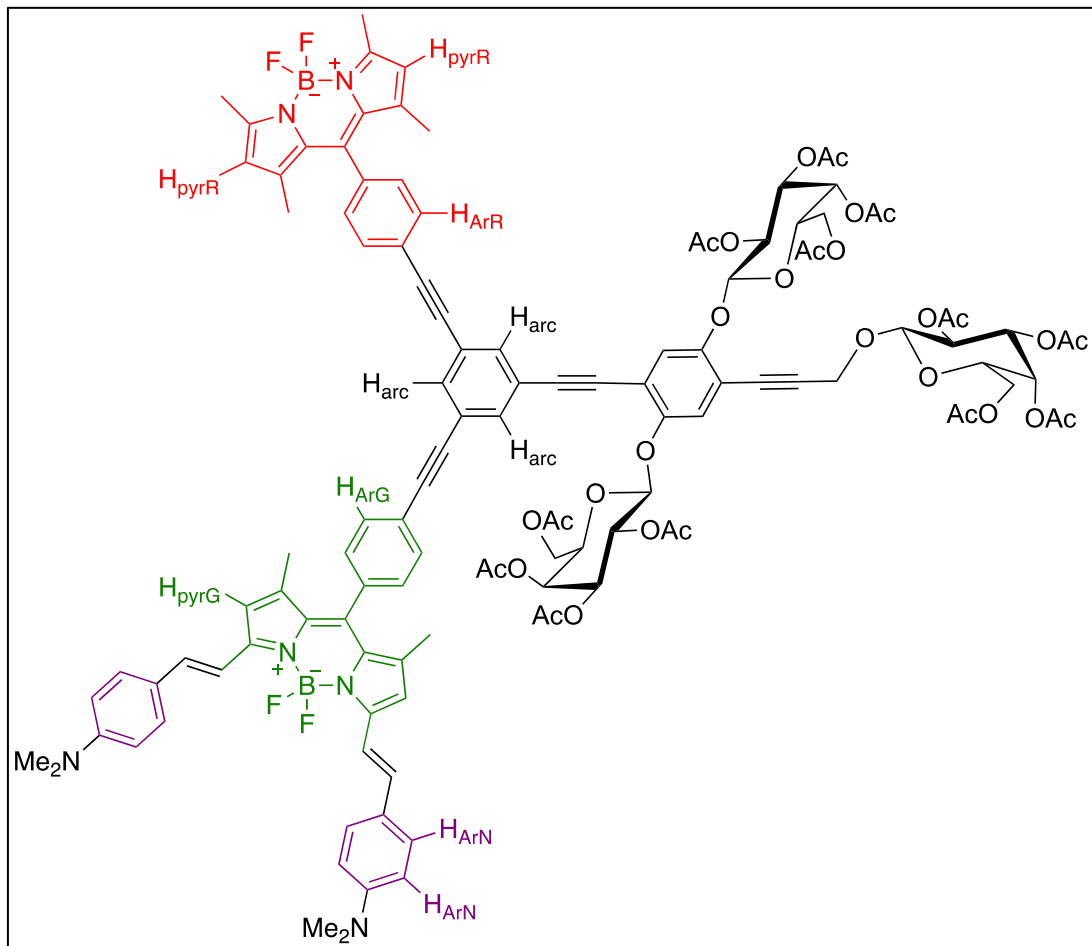

<sup>1</sup>H NMR (500 MHz, CDCl<sub>3</sub>)  $\delta$ : 7.78, 7.76 and 7.74 (3H, 2 x t,  $J_m$ =1.5, H<sub>arc</sub>), 7.69 and 7.66 (4H, m, 2 x H<sub>ArG</sub>, 2 x H<sub>ArR</sub>), 7.56 and 7.20 (4H, AB system,  $J_{vic}$ =16.1, HC=CH), 7.53 (4H, d,  $J_o$ =8.8, 4 x H<sub>ArN</sub>), 7.38 and 7.32 (4H, 2 x d,  $J_o$ =7.8, 2 x H<sub>ArG</sub>, 2 x H<sub>ArR</sub>), 7.21 and 7.16 (2H, 2 x s, H-3,6), 6.71 (4H, d, 4 x H<sub>ArN</sub>), 6.61 (2H, s, H<sub>pyrG</sub>), 6.01 (2H, s, H<sub>pyrR</sub>), 5.64 and 5.55 (2H, 2 x dd,  $J_{1,2}$ =7.8,  $J_{2,3}$ =10.8, H-2', H-2''), 5.49-5.47 (2H, m, H-4', H-4''), 5.41-5.40 (1H, m, H-4'''), 5.24 (1H, dd,  $J_{1,2}$ =7.8,  $J_{2,3}$ =10.8, H-2'''), 5.21-5.15 (3H, m, H-3', H-3'', H-3'''), 5.06 and 5.04 (2H, 2 x d, H-1', H-1''), 4.80 (1H, d, H-1'''), 4.66 and 4.62 (2H, narrow AB system,  $J_{gem}$ =16.2, CH<sub>2</sub>C=C), 4.32-4.04 (9H, m, H-5', H-5'', H-5''', H<sub>2</sub>-6', H<sub>2</sub>-6'', H<sub>2</sub>-6'''), 3.03 (12H, s, 2 x N(CH<sub>3</sub>)<sub>2</sub>), 2.56 (6H, s, 2 x CH<sub>3pyrR</sub>), 2.20, 2.19, 2.17, 2.10, 2.07, 2.06, 2.05, 2.04, 2.03, 2.02, 2.00, 1.98, 1.95 (36H, 13 x s, CH<sub>3</sub>CO), 1.48 and 1.44 (12H, 2 x s, 2 x CH<sub>3pyrG</sub>, 2 x CH<sub>3pyrR</sub>). <sup>13</sup>C NMR (125 MHz, CDCl<sub>3</sub>)  $\delta$ : 170.5, 170.4, 170.2, 170.1, 170.6, 170.2, 169.4, 169.1, 155.8, 153.1, 153.0, 152.8, 150.9, 142.9, 140.6, 136.6, 136.3, 135.5, 135.0, 134.9, 134.7, 134.4, 134.3, 132.7, 132.4, 132.1, 131.1, 129.2, 129.1, 128.3, 125.0, 124.0, 123.8, 123.6, 123.5, 123.1, 121.4, 120.8, 119.8, 117.4, 115.1, 114.8, 114.5, 112.1, 100.4, 100.0, 99.4, 94.0, 90.8, 90.3, 90.0, 88.9, 88.6, 85.4, 81.1, 71.3, 71.2, 70.8, 70.7, 70.6, 70.5, 68.9, 68.3, 68.2, 67.1, 66.8, 61.5, 61.2, 60.3, 57.1, 53.4, 40.2, 20.8, 20.7, 20.6, 20.5, 14.8 and 14.6.

ESI (+)-MS  $m/z$  calcd for  $C_{119}H_{118}B_2F_4N_6O_{30}$   $[M+H]^+=2209.8$ ; found  $[M+H]^+=2212.1$   $C_{119}H_{116}D_2B_2F_4N_6O_{30}$  (please note that two protons exchanged with deuterium because of deuterated solvent). Anal. Calcd for  $C_{119}H_{118}B_2F_4N_6O_{30}$  (2209,88): C, 64.68; H, 5.38; N, 3.80; Found: C, 64.58; H, 5.35; N, 3.80.

## GalTEBB-2

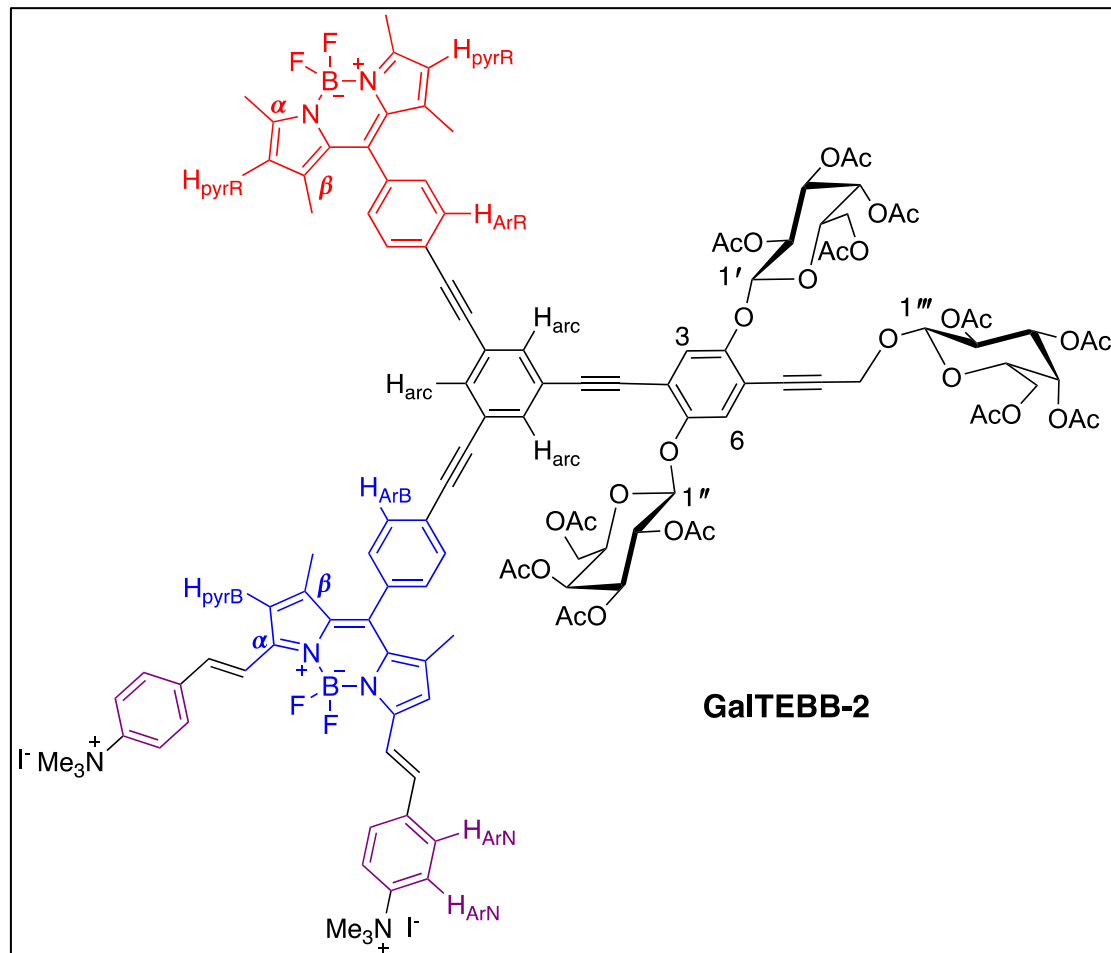

$^1H$  NMR (500 MHz, acetone- $d_6$ )  $\delta$ : 8.34 (4H, d,  $J_o=8.8$ , 4 x  $H_{ArN}$ ), 7.96-7.80 (12H, m, 2 x  $H_{ArB}$ ,  $H_{Arc}$ , 4 x  $H_{ArN}$ , 2 x  $H_{ArR}$ , HC=C), 7.69 (2H, a part of an AB system,  $J_{vic}=16.1$ , C=CH), 7.63 and 7.54 (4H, 2 x d,  $J_o=7.9$  and 7.8, 2 x  $H_{ArB}$ , 2 x  $H_{ArR}$ ), 7.46 and 7.40 (2H, 2 x s, H-3,6), 7.01 (2H, s,  $H_{pyrB}$ ), 6.15 (2H, s,  $H_{pyrR}$ ), 5.63 - 5.41 and 5.35 - 5.15 (11H, m, H-2', H-2'', H-2''', H-4', H-4'', H-4''', H-1', H-1''), 4.98 (1H, d,  $J_{1,2}=7.3$ , H-1'''), 4.72 and 4.60 (2H, narrow AB system,  $J_{gem}=15.5$ ,  $CH_2C=C$ ), 4.58-4.52 and 4.25-4.08 (9H, 2 x m, H-5', H-5'', H-5''', H-2-6', H-2-6'', H-2-6'''), 4.01 (s, 18H, 2 x  $N(CH_3)_3$ ), 2.52 (6H, s, 2 x  $CH_3_{pyrR}$ ), 2.20-1.93 (36H, 15 x s,  $CH_3CO$ ), 1.60 and 1.49 (12H, 2 x s, 2 x  $CH_3_{pyrB}$ , 2 x  $CH_3_{pyrR}$ ).  $^{13}C$  NMR (125 MHz, acetone- $d_6$ )  $\delta$ : 171.5, 171.4, 171.3, 171.2, 170.9, 170.7, 170.6, 170.5, 157.1, 154.7, 154.3, 153.8, 148.8, 144.5, 142.8, 141.5, 140.2, 137.1, 136.8, 136.7, 136.6, 136.0, 135.9, 135.7, 135.0, 134.9, 134.2, 134.1, 132.5, 131.9, 131.8, 130.6, 130.1, 125.7, 125.6, 125.3, 125.0, 123.1, 122.9, 121.4, 120.4, 116.1, 115.7, 101.1, 100.9, 94.8, 92.9, 92.1, 91.7, 90.3, 90.0, 87.6, 82.3, 73.0, 72.9, 72.4, 72.3, 72.1, 70.4, 70.0, 69.9, 69.0, 68.9, 63.2, 62.8, 58.7, 58.2, 21.6, 21.5, 21.3, 21.2, 15.8, 15.4 and 15.3. ESI (+)-MS  $m/z$  calcd for  $C_{121}H_{124}B_2F_4N_6O_{30}^{2+}$ ;  $[M^{2+}]=1119.93$  found  $[M^{2+}]=1123.82$   $C_{121}H_{116}D_8B_2F_4N_6O_{30}^{2+}$  (please note that eight protons exchanged with deuterium because of deuterated solvent). Anal. Calcd for  $C_{121}H_{124}B_2F_4I_2N_6O_{30}$  (2493,76): C, 58.28; H, 5.01; N, 3.37; Found: C, 58.19; H, 5.04; N, 3.36.

## 3. Fluorescence experiments

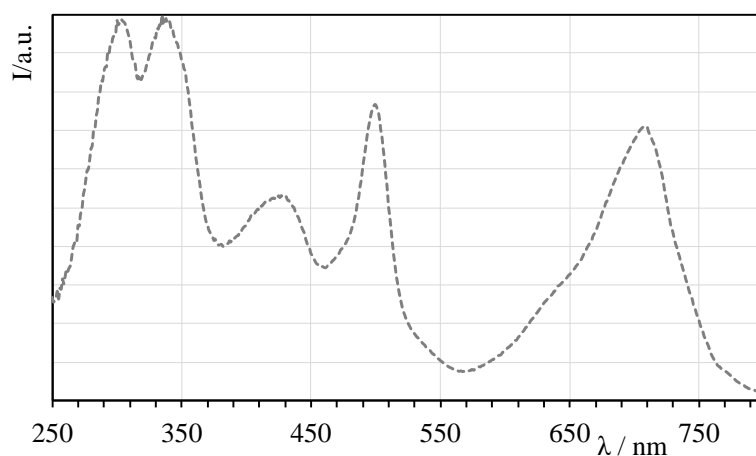

**Figure S1.** Excitation spectrum of **GalTEBB-1** in CH<sub>3</sub>CN solution registered @790 nm.

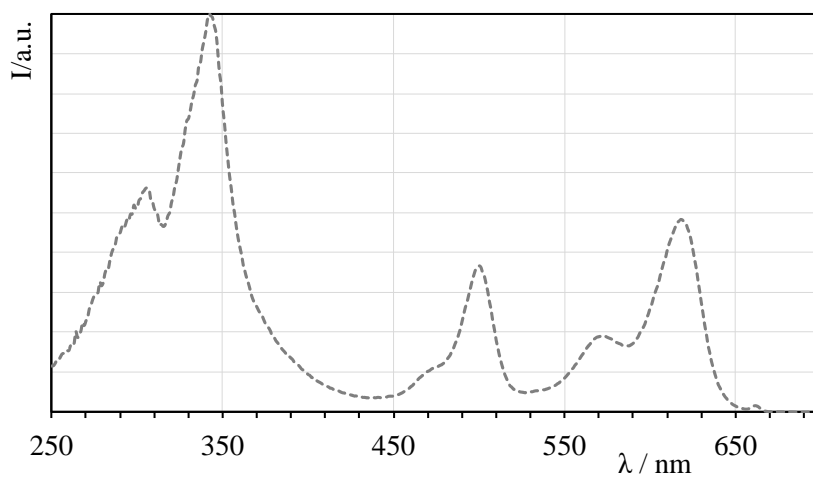

**Figure S2.** Excitation spectrum of **GalTEBB-2** in CH<sub>3</sub>CN solution registered @690 nm.

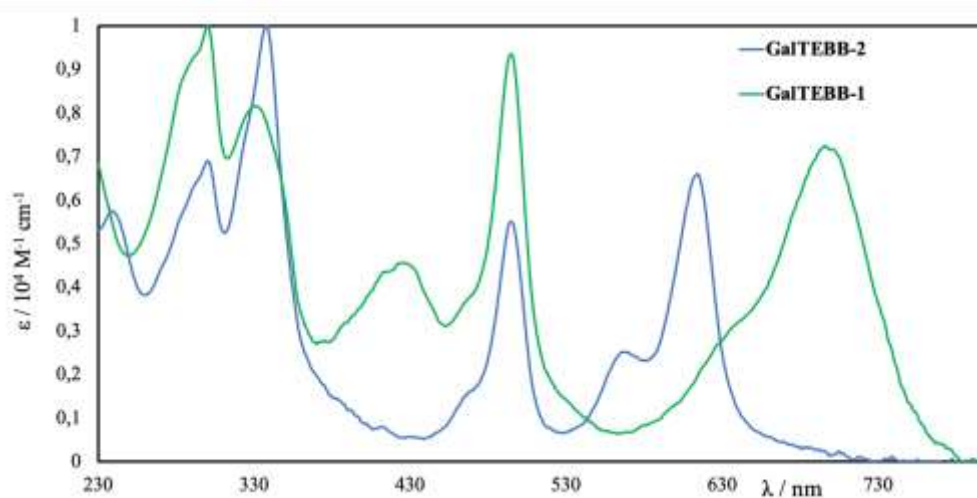

**Figure S3.** UV-Vis Absorption spectra of compound **GalTEBB-1** and **GalTEBB-2** in CH<sub>3</sub>CN.

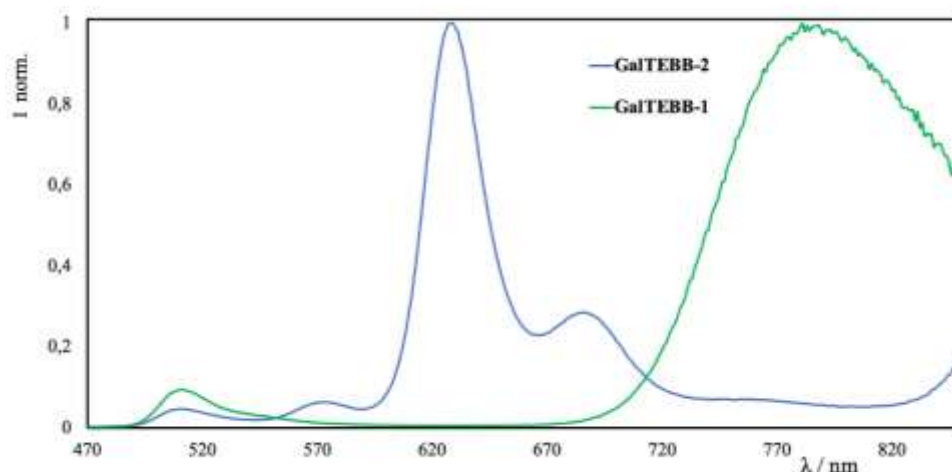

**Figure S4.** Emission spectra of compound **GalTEBB-1** and **GalTEBB-2** in CH<sub>3</sub>CN  $\lambda_{\text{ex}}$  450 nm.

## 4. Biological data

**Table S1.** Correlation between of DMSO and bodipy-tagged galactoconjugates

| DMSO (%) | GalTEBB (μg/mL) |
|----------|-----------------|
| 12.5     | 250             |
| 6.25     | 125             |
| 3.12     | 62.5            |
| 1.56     | 31.25           |
| 0.78     | 15.6            |

**Table S2.** Bactericidal activity of DMSO, **GalTEBB-1** and **GalTEBB-2** against *P. aeruginosa* at different concentrations

| <b>12.5 % DMSO - 250 μg/mL GalTEBB</b>  |            |                     |              |         |                  |
|-----------------------------------------|------------|---------------------|--------------|---------|------------------|
| Tukey's multiple comparisons test       | Mean Diff, | 95,00% CI of diff,  | Significant? | Summary | Adjusted P Value |
| CTR vs. GalTEBB-1                       | 7,155      | 7,093 to 7,217      | Yes          | ***     | <0,001           |
| CTR vs. GalTEBB-2                       | 7,171      | 7,109 to 7,233      | Yes          | ***     | <0,001           |
| CTR vs. DMSO                            | 7,198      | 7,136 to 7,260      | Yes          | ***     | <0,001           |
| GalTEBB-1 vs. GalTEBB-2                 | 0,01667    | -0,04517 to 0,07850 | No           | ns      | 0,82             |
| GalTEBB-1 vs. DMSO                      | 0,04333    | -0,01850 to 0,1052  | No           | ns      | 0,19             |
| GalTEBB-2 vs. DMSO                      | 0,02667    | -0,03517 to 0,08850 | No           | ns      | 0,54             |
| <b>6.25 % DMSO - 125 μg/mL GalTEBB</b>  |            |                     |              |         |                  |
| Tukey's multiple comparisons test       | Mean Diff, | 95,00% CI of diff,  | Significant? | Summary | Adjusted P Value |
| CTR vs. GalTEBB-1                       | 7,151      | 7,102 to 7,200      | Yes          | ***     | <0,001           |
| CTR vs. GalTEBB-2                       | 7,161      | 7,112 to 7,210      | Yes          | ***     | <0,001           |
| CTR vs. DMSO                            | 7,078      | 7,029 to 7,127      | Yes          | ***     | <0,001           |
| GalTEBB-1 vs. GalTEBB-2                 | 0,01000    | -0,03898 to 0,05898 | No           | ns      | 0,91             |
| GalTEBB-1 vs. DMSO                      | -0,07333   | -0,1223 to -0,02435 | Yes          | **      | 0,006            |
| GalTEBB-2 vs. DMSO                      | -0,08333   | -0,1323 to -0,03435 | Yes          | **      | 0,003            |
| <b>3.12 % DMSO - 62.5 μg/mL GalTEBB</b> |            |                     |              |         |                  |



| Tukey's multiple comparisons test        | Mean Diff, | 95,00% CI of diff, | Significant? | Summary | Adjusted P Value |
|------------------------------------------|------------|--------------------|--------------|---------|------------------|
| CTR vs. GalTEBB-1                        | 5,544      | 4,822 to 6,266     | Yes          | ***     | <0,001           |
| CTR vs. GalTEBB-2                        | 5,236      | 4,515 to 5,958     | Yes          | ***     | <0,001           |
| CTR vs. DMSO                             | 2,925      | 2,203 to 3,646     | Yes          | ***     | <0,001           |
| GalTEBB-1 vs. GalTEBB-2                  | -0,3077    | -1,029 to 0,4140   | No           | ns      | 0,55             |
| GalTEBB-1 vs. DMSO                       | -2,619     | -3,341 to -1,898   | Yes          | ***     | <0,001           |
| GalTEBB-2 vs. DMSO                       | -2,312     | -3,033 to -1,590   | Yes          | ***     | <0,001           |
| <b>1.56 % DMSO - 31.25 µg/mL GalTEBB</b> |            |                    |              |         |                  |
| Tukey's multiple comparisons test        | Mean Diff, | 95,00% CI of diff, | Significant? | Summary | Adjusted P Value |
| CTR vs. GalTEBB-1                        | 4,061      | 3,280 to 4,842     | Yes          | ***     | <0,001           |
| CTR vs. GalTEBB-2                        | 3,479      | 2,698 to 4,260     | Yes          | ***     | <0,001           |
| CTR vs. DMSO                             | 1,968      | 1,187 to 2,749     | Yes          | ***     | <0,001           |
| GalTEBB-1 vs. GalTEBB-2                  | -0,5827    | -1,364 to 0,1983   | No           | ns      | 0,16             |
| GalTEBB-1 vs. DMSO                       | -2,093     | -2,874 to -1,312   | Yes          | ***     | <0,001           |
| GalTEBB-2 vs. DMSO                       | -1,511     | -2,292 to -0,7297  | Yes          | **      | 0,001            |
| <b>0.78 % DMSO - 15.6 µg/mL GalTEBB</b>  |            |                    |              |         |                  |
| Tukey's multiple comparisons test        | Mean Diff, | 95,00% CI of diff, | Significant? | Summary | Adjusted P Value |
| CTR vs. GalTEBB-1                        | 3,061      | 2,438 to 3,684     | Yes          | ***     | <0,001           |
| CTR vs. GalTEBB-2                        | 2,443      | 1,820 to 3,066     | Yes          | ***     | <0,001           |
| CTR vs. DMSO                             | 1,845      | 1,222 to 2,468     | Yes          | ***     | <0,001           |
| GalTEBB-1 vs. GalTEBB-2                  | -0,6180    | -1,241 to 0,004938 | No           | ns      | 0,05             |
| GalTEBB-1 vs. DMSO                       | -1,216     | -1,839 to -0,5934  | Yes          | **      | 0,001            |
| GalTEBB-2 vs. DMSO                       | -0,5983    | -1,221 to 0,02460  | No           | ns      | 0,06             |

**Table S3.** Bactericidal activity of DMSO, GalTEBB-1 and GalTEBB-2 against *S. aureus* at different concentrations

| <b>12.5 % DMSO - 250 µg/mL GalTEBB</b> |            |                     |              |         |                  |
|----------------------------------------|------------|---------------------|--------------|---------|------------------|
| Tukey's multiple comparisons test      | Mean Diff, | 95,00% CI of diff,  | Significant? | Summary | Adjusted P Value |
| CTR vs. GalTEBB-1                      | 5,174      | 5,010 to 5,338      | Yes          | ***     | <0,001           |
| CTR vs. GalTEBB-2                      | 5,174      | 5,010 to 5,338      | Yes          | ***     | <0,001           |
| CTR vs. DMSO                           | 4,430      | 4,266 to 4,594      | Yes          | ***     | <0,001           |
| GalTEBB-1 vs. GalTEBB-2                | 0,000      | -0,1640 to 0,1640   | No           | ns      | >0,99            |
| GalTEBB-1 vs. DMSO                     | -0,7433    | -0,9074 to -0,5793  | Yes          | ***     | <0,001           |
| GalTEBB-2 vs. DMSO                     | -0,7433    | -0,9074 to -0,5793  | Yes          | ***     | <0,001           |
| <b>6.25 % DMSO - 125 µg/mL GalTEBB</b> |            |                     |              |         |                  |
| Tukey's multiple comparisons test      | Mean Diff, | 95,00% CI of diff,  | Significant? | Summary | Adjusted P Value |
| CTR vs. GalTEBB-1                      | 4,397      | 4,043 to 4,751      | Yes          | ***     | <0,001           |
| CTR vs. GalTEBB-2                      | 4,000      | 3,646 to 4,354      | Yes          | ***     | <0,001           |
| CTR vs. DMSO                           | 1,483      | 1,129 to 1,837      | Yes          | ***     | <0,001           |
| GalTEBB-1 vs. GalTEBB-2                | -0,3967    | -0,7506 to -0,04271 | Yes          | *       | 0,03             |
| GalTEBB-1 vs. DMSO                     | -2,914     | -3,268 to -2,560    | Yes          | ***     | <0,001           |
| GalTEBB-2 vs. DMSO                     | -2,518     | -2,872 to -2,164    | Yes          | ***     | <0,001           |

| <b>3.12 % DMSO - 62.5 µg/mL GalTEBB</b>  |            |                    |              |         |                  |
|------------------------------------------|------------|--------------------|--------------|---------|------------------|
| Tukey's multiple comparisons test        | Mean Diff, | 95,00% CI of diff, | Significant? | Summary | Adjusted P Value |
| CTR vs. GalTEBB-1                        | 3,937      | 3,559 to 4,315     | Yes          | ***     | <0,001           |
| CTR vs. GalTEBB-2                        | 3,439      | 3,061 to 3,817     | Yes          | ***     | <0,001           |
| CTR vs. DMSO                             | 1,165      | 0,7870 to 1,543    | Yes          | ***     | <0,001           |
| GalTEBB-1 vs. GalTEBB-2                  | -0,4980    | -0,8760 to -0,1200 | Yes          | *       | 0,01             |
| GalTEBB-1 vs. DMSO                       | -2,772     | -3,150 to -2,394   | Yes          | ***     | <0,001           |
| GalTEBB-2 vs. DMSO                       | -2,274     | -2,652 to -1,896   | Yes          | ***     | <0,001           |
|                                          |            |                    |              |         |                  |
| <b>1.56 % DMSO - 31.25 µg/mL GalTEBB</b> |            |                    |              |         |                  |
| Tukey's multiple comparisons test        | Mean Diff, | 95,00% CI of diff, | Significant? | Summary | Adjusted P Value |
| CTR vs. GalTEBB-1                        | 3,397      | 2,982 to 3,812     | Yes          | ***     | <0,001           |
| CTR vs. GalTEBB-2                        | 2,650      | 2,236 to 3,065     | Yes          | ***     | <0,001           |
| CTR vs. DMSO                             | 0,9217     | 0,5071 to 1,336    | Yes          | ***     | <0,001           |
| GalTEBB-1 vs. GalTEBB-2                  | -0,7467    | -1,161 to -0,3321  | Yes          | **      | 0,002            |
| GalTEBB-1 vs. DMSO                       | -2,475     | -2,890 to -2,061   | Yes          | ***     | <0,001           |
| GalTEBB-2 vs. DMSO                       | -1,729     | -2,143 to -1,314   | Yes          | ***     | <0,001           |
|                                          |            |                    |              |         |                  |
| <b>0.78 % DMSO - 15.6 µg/mL GalTEBB</b>  |            |                    |              |         |                  |
| Tukey's multiple comparisons test        | Mean Diff, | 95,00% CI of diff, | Significant? | Summary | Adjusted P Value |
| CTR vs. GalTEBB-1                        | 2,304      | 1,969 to 2,639     | Yes          | ***     | <0,001           |
| CTR vs. GalTEBB-2                        | 2,010      | 1,675 to 2,345     | Yes          | ***     | <0,001           |
| CTR vs. DMSO                             | 0,7850     | 0,4501 to 1,120    | Yes          | ***     | <0,001           |
| GalTEBB-1 vs. GalTEBB-2                  | -0,2933    | -0,6282 to 0,04157 | No           | ns      | 0,09             |
| GalTEBB-1 vs. DMSO                       | -1,519     | -1,854 to -1,184   | Yes          | ***     | <0,001           |
| GalTEBB-2 vs. DMSO                       | -1,225     | -1,560 to -0,8904  | Yes          | ***     | <0,001           |

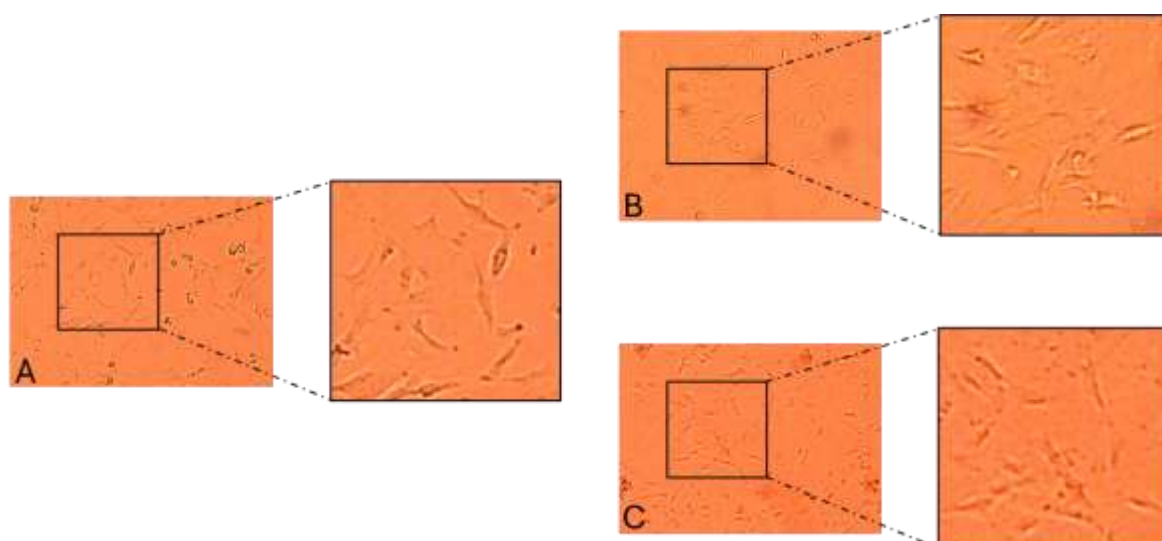

**Figure S5** Optical microscope images of cell line hFOB 1.19 in normal conditions (A) and exposed to GalTEBB-1 (B) and 2 (C) at a final concentration of 62.5µg/mL for 24h.

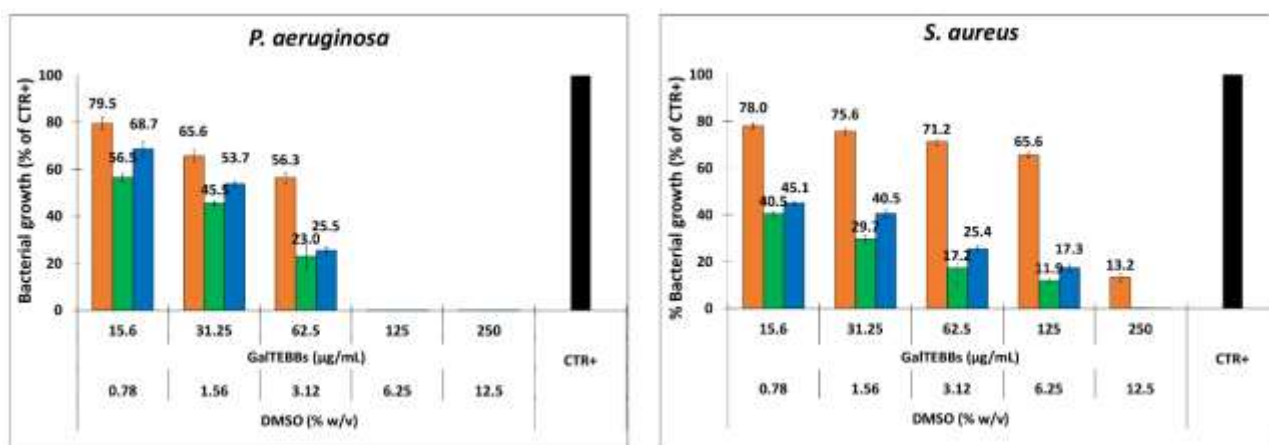

**Figure S6:** Antibacterial activity under a white-light source (26000 lux, fluence rate 3.81 mW/cm<sup>2</sup>) for 1 h (totalling 13.7 J/cm<sup>2</sup> fluence) of DMSO (orange), GalTEBB-1 (green) and GalTEBB-2 (blue) against *P. aeruginosa* and *S. aureus*.

## 5. NMR Spectra of products

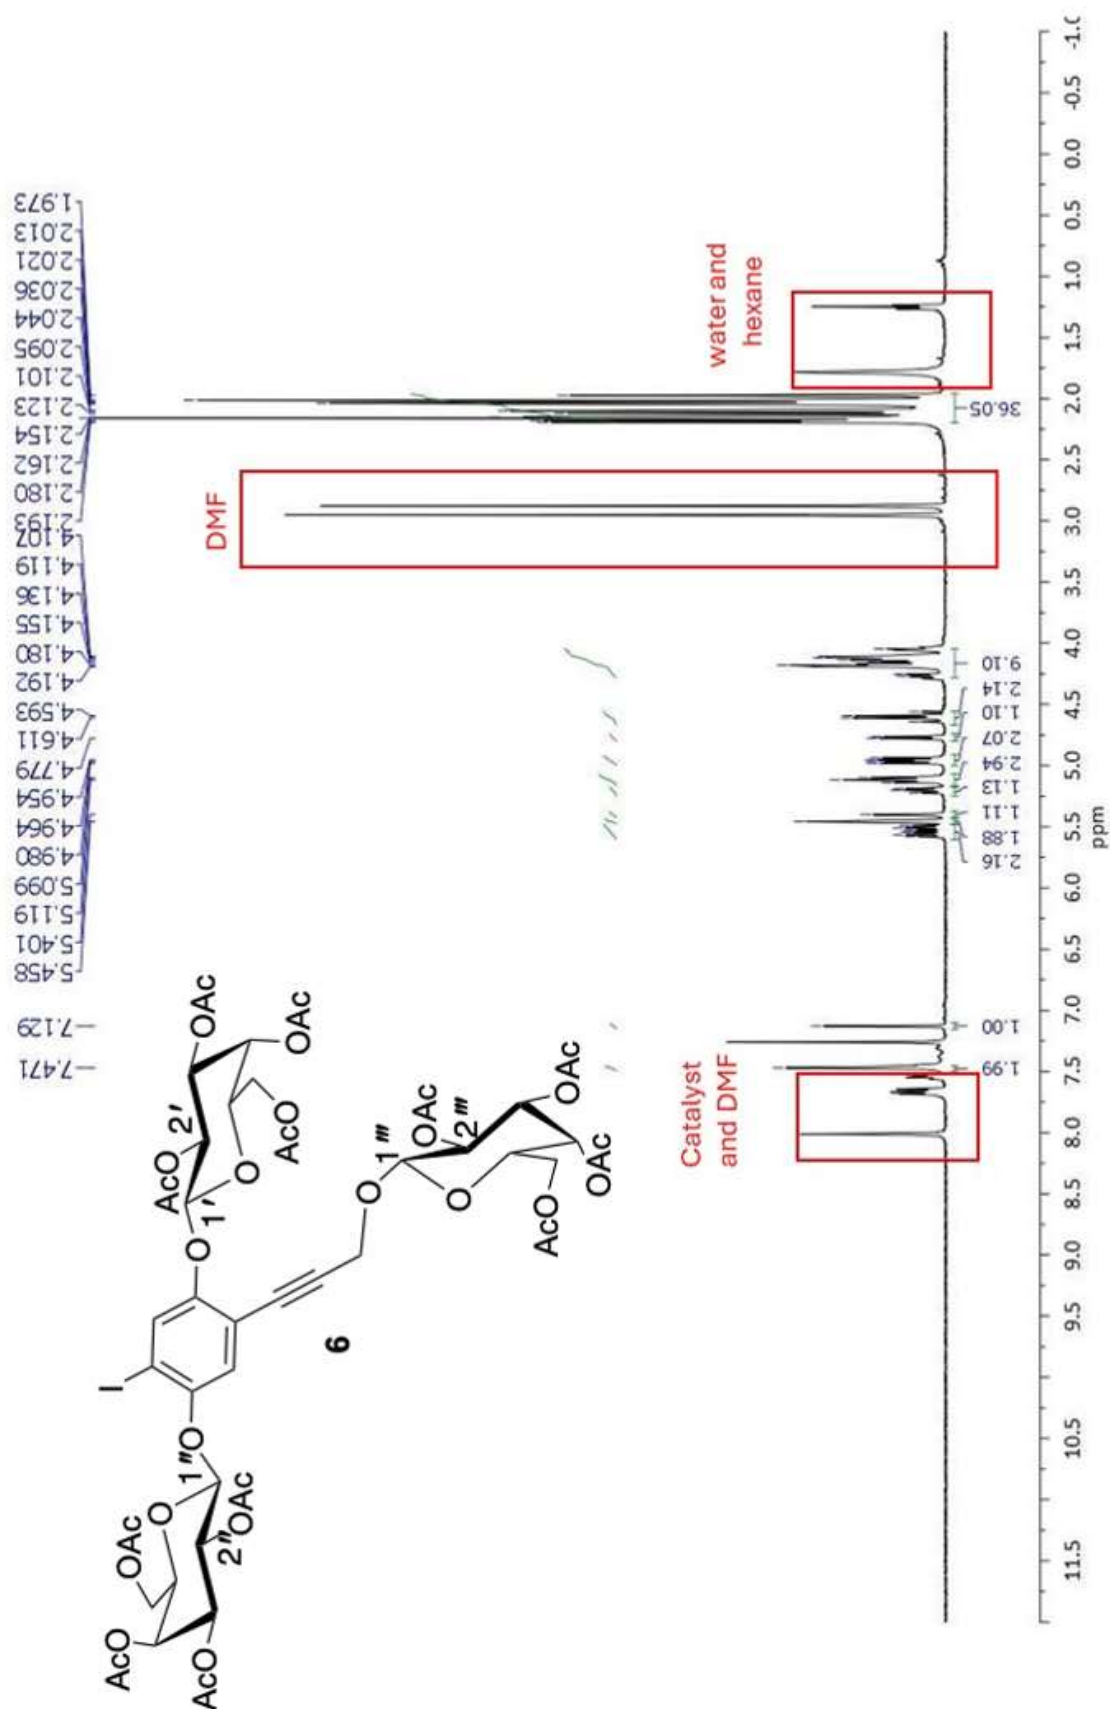

Figure S7.  $^1\text{H}$ -NMR compound **6** in  $\text{CDCl}_3$

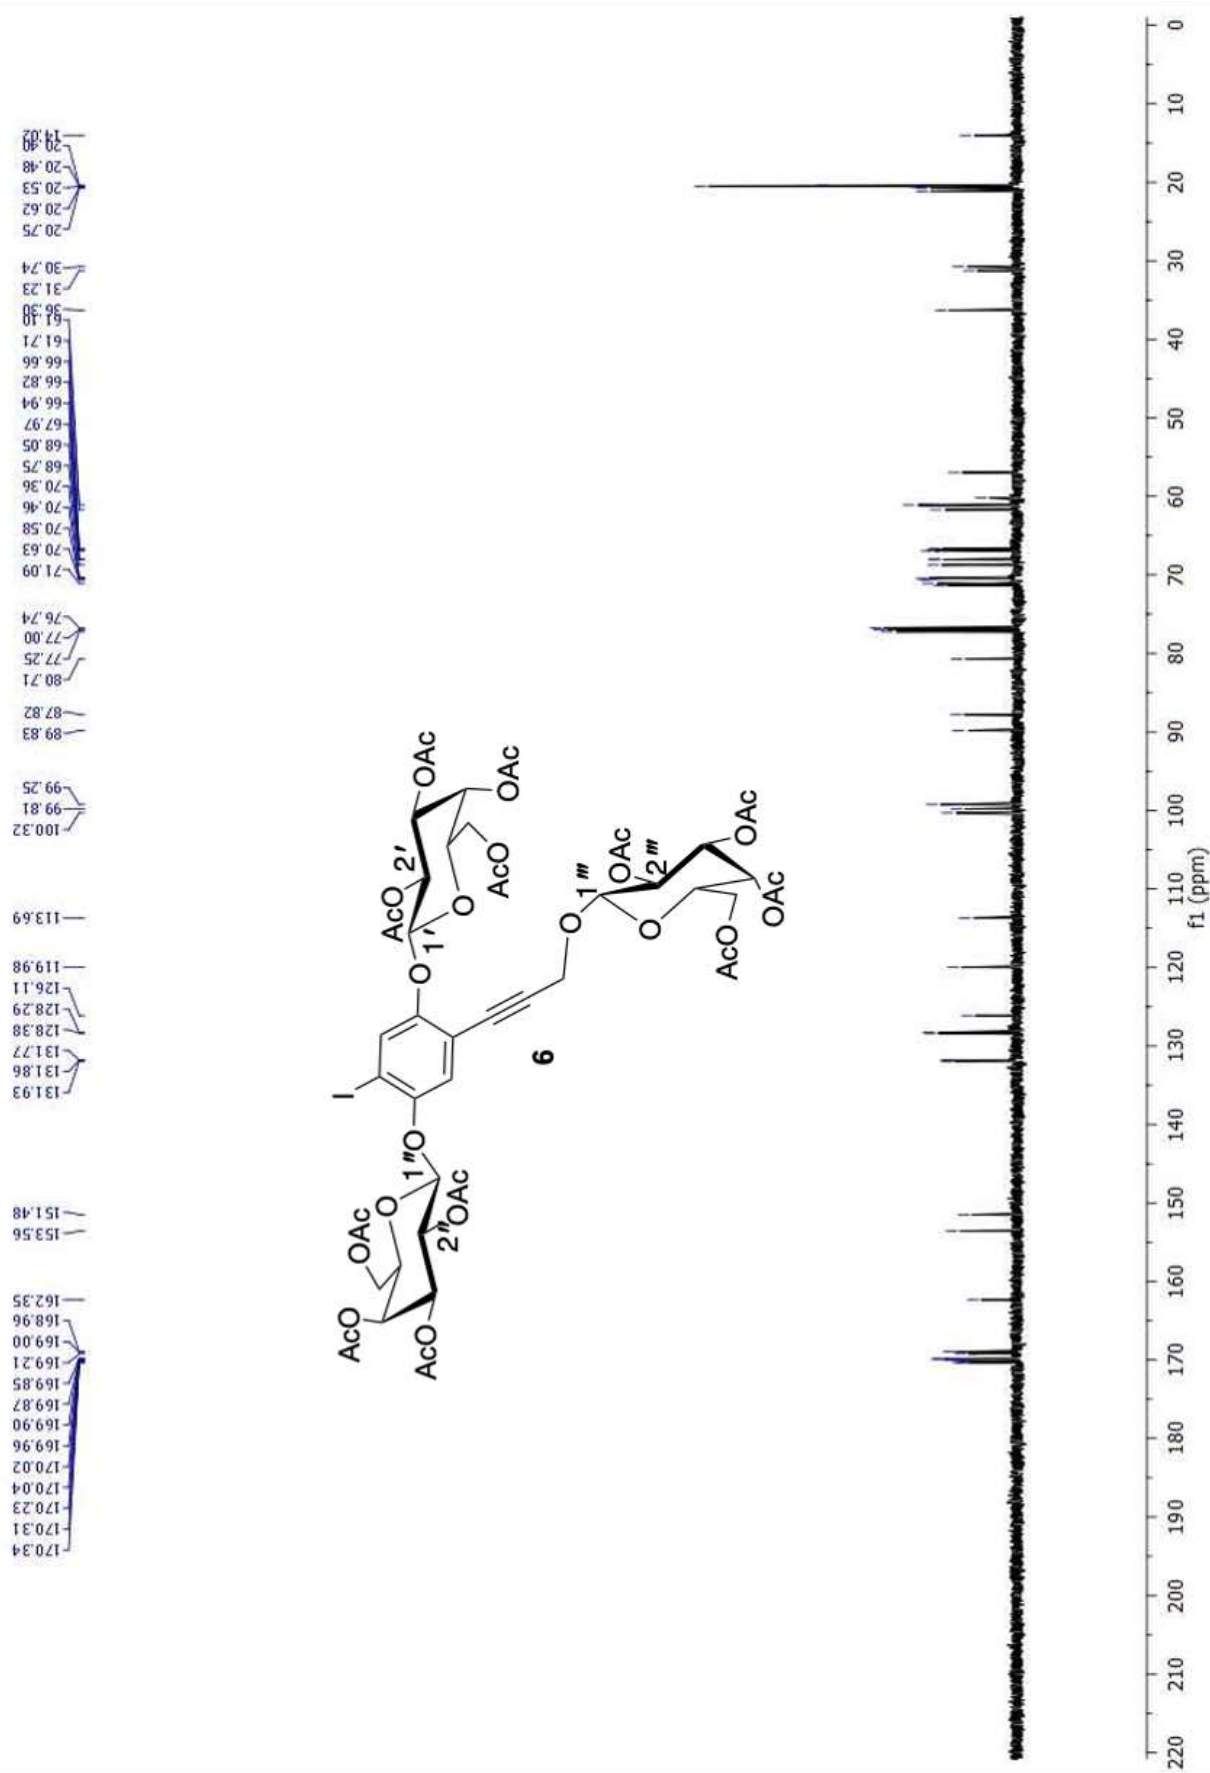

Figure S8.  $^{13}\text{C}$ -NMR compound **6** in  $\text{CDCl}_3$

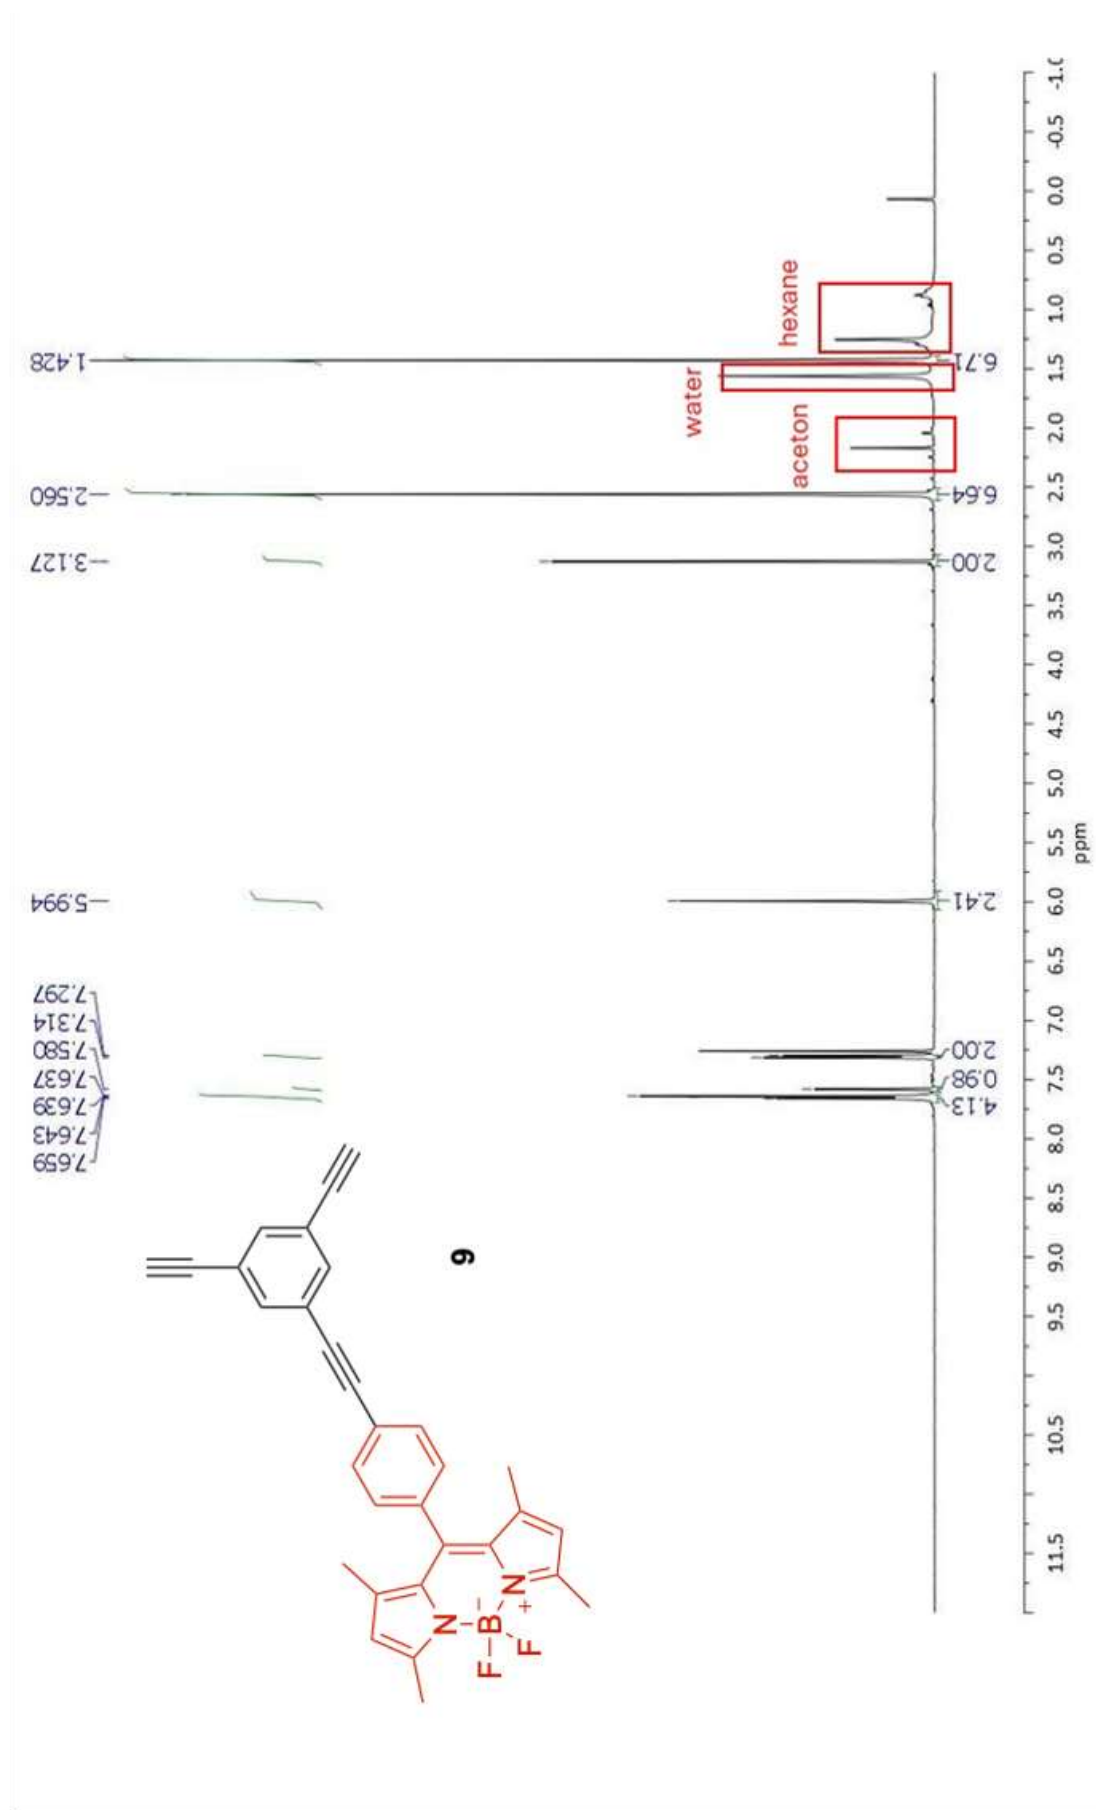

**Figure S9.** <sup>1</sup>H-NMR compound **9** in CDCl<sub>3</sub>

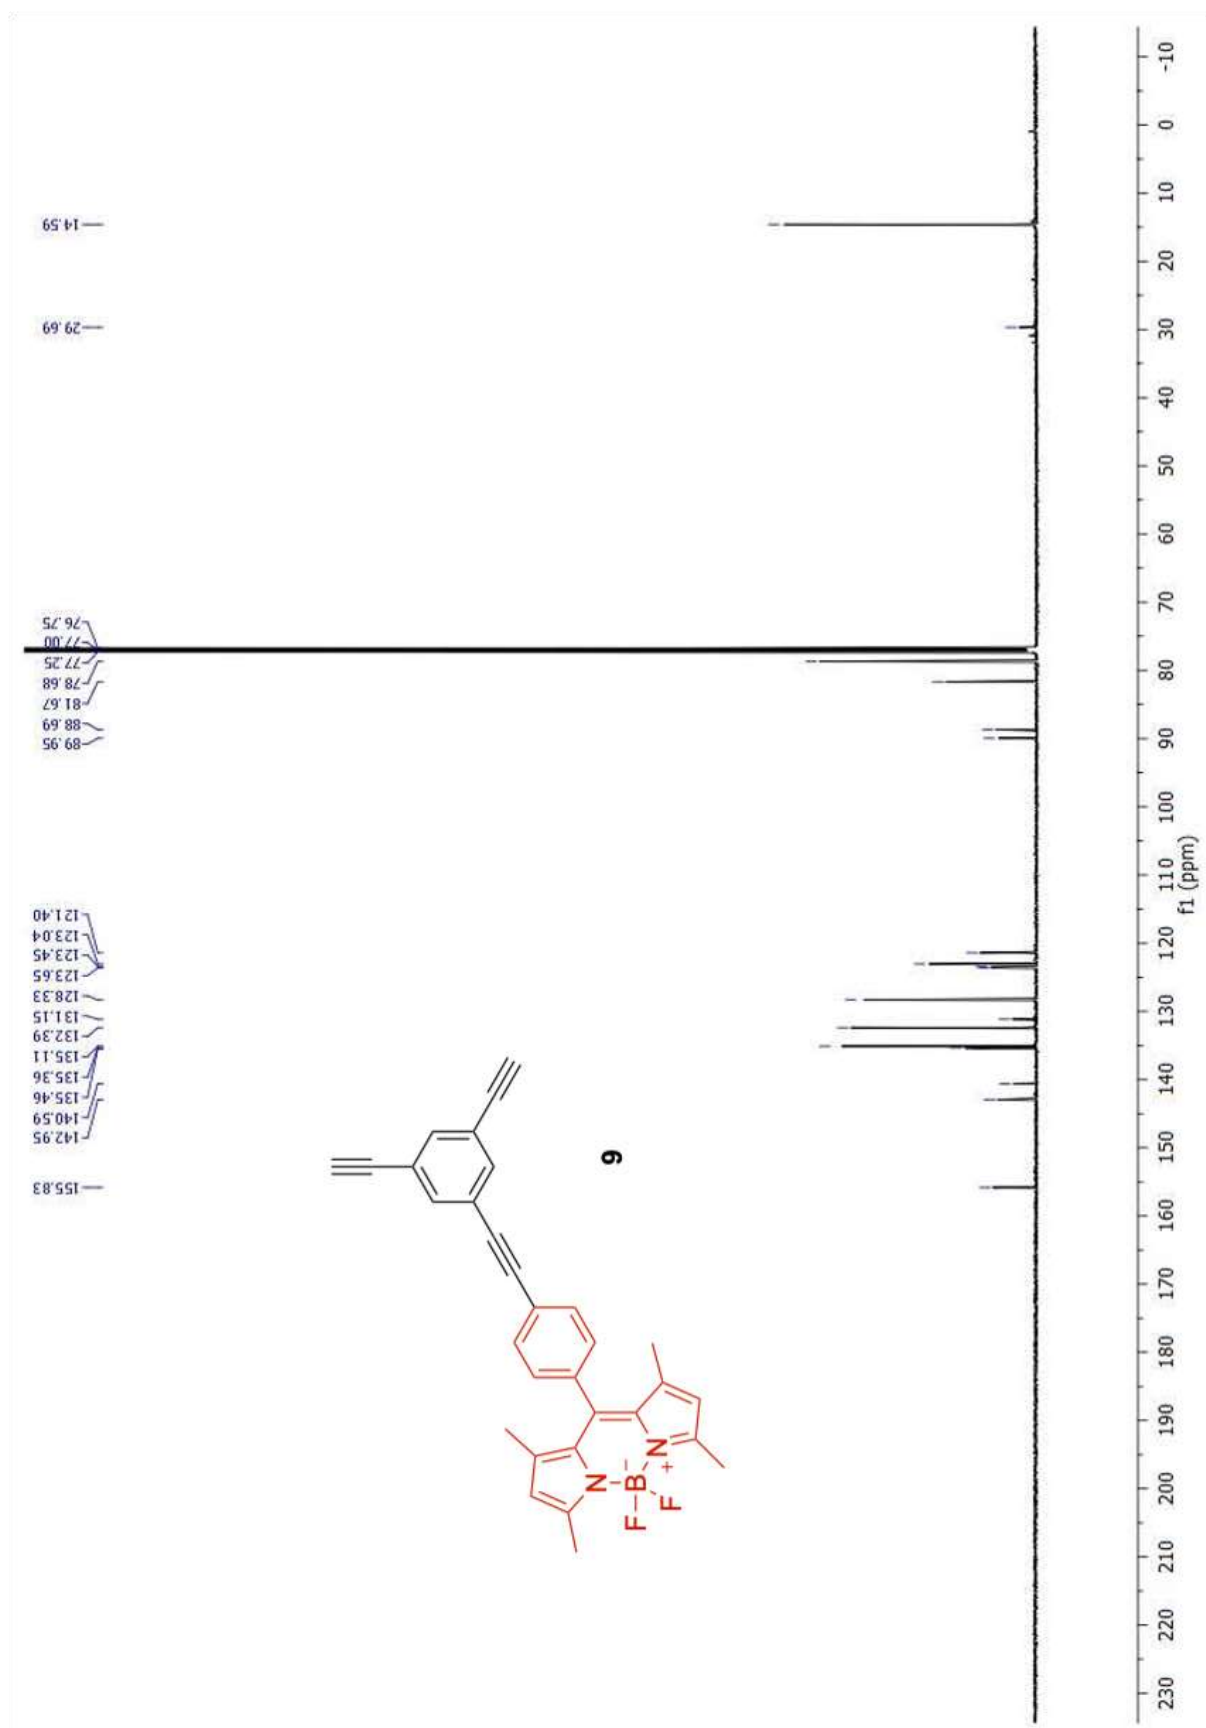

**Figure S10.**  $^{13}\text{C}$ -NMR compound **9** in  $\text{CDCl}_3$

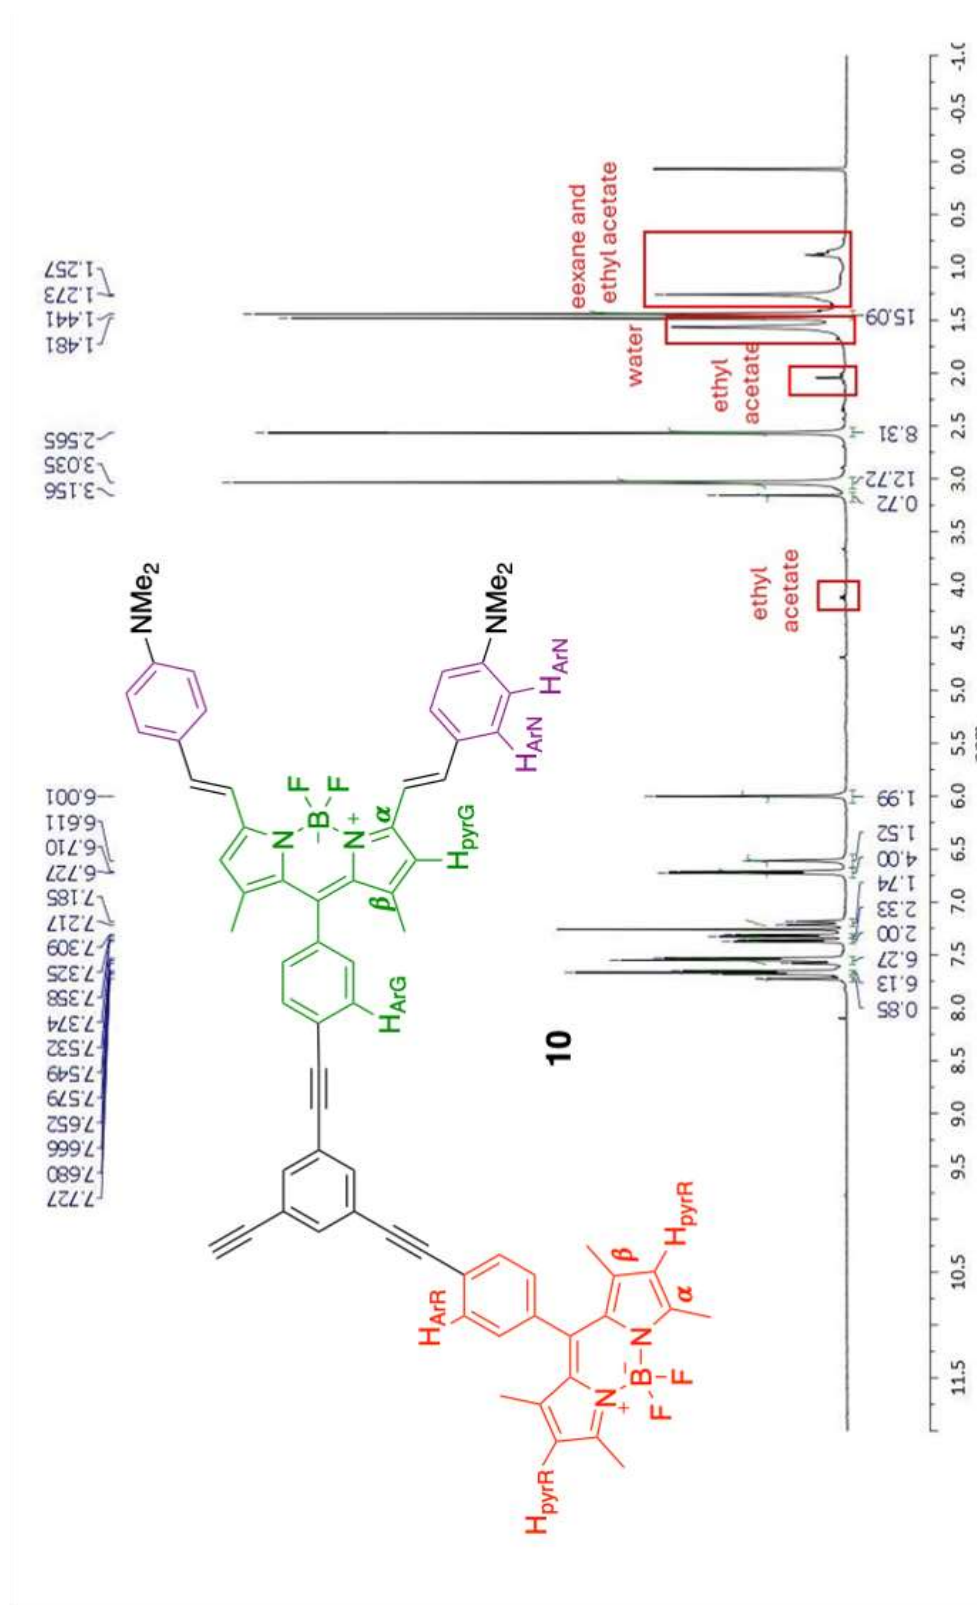

**Figure S11.** <sup>1</sup>H-NMR compound **10** in CDCl<sub>3</sub>



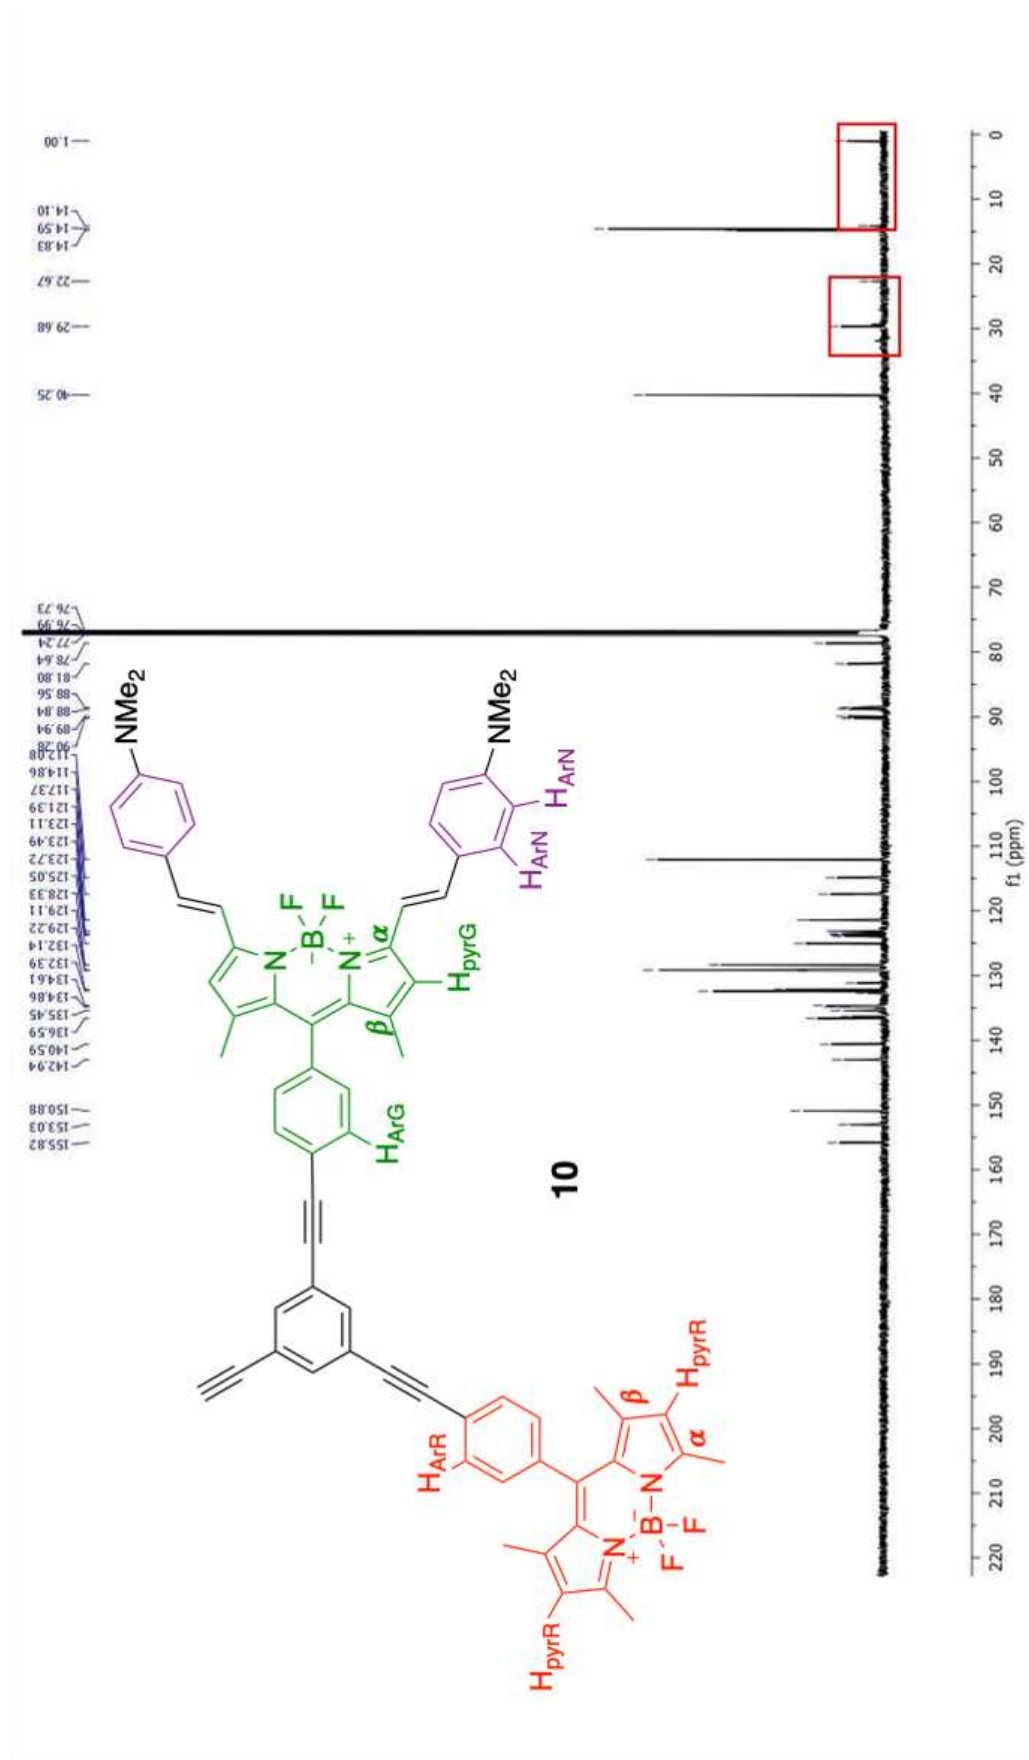

**Figure S12.**  $^{13}C$ -NMR compound **10** in  $CDCl_3$



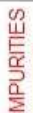

S19

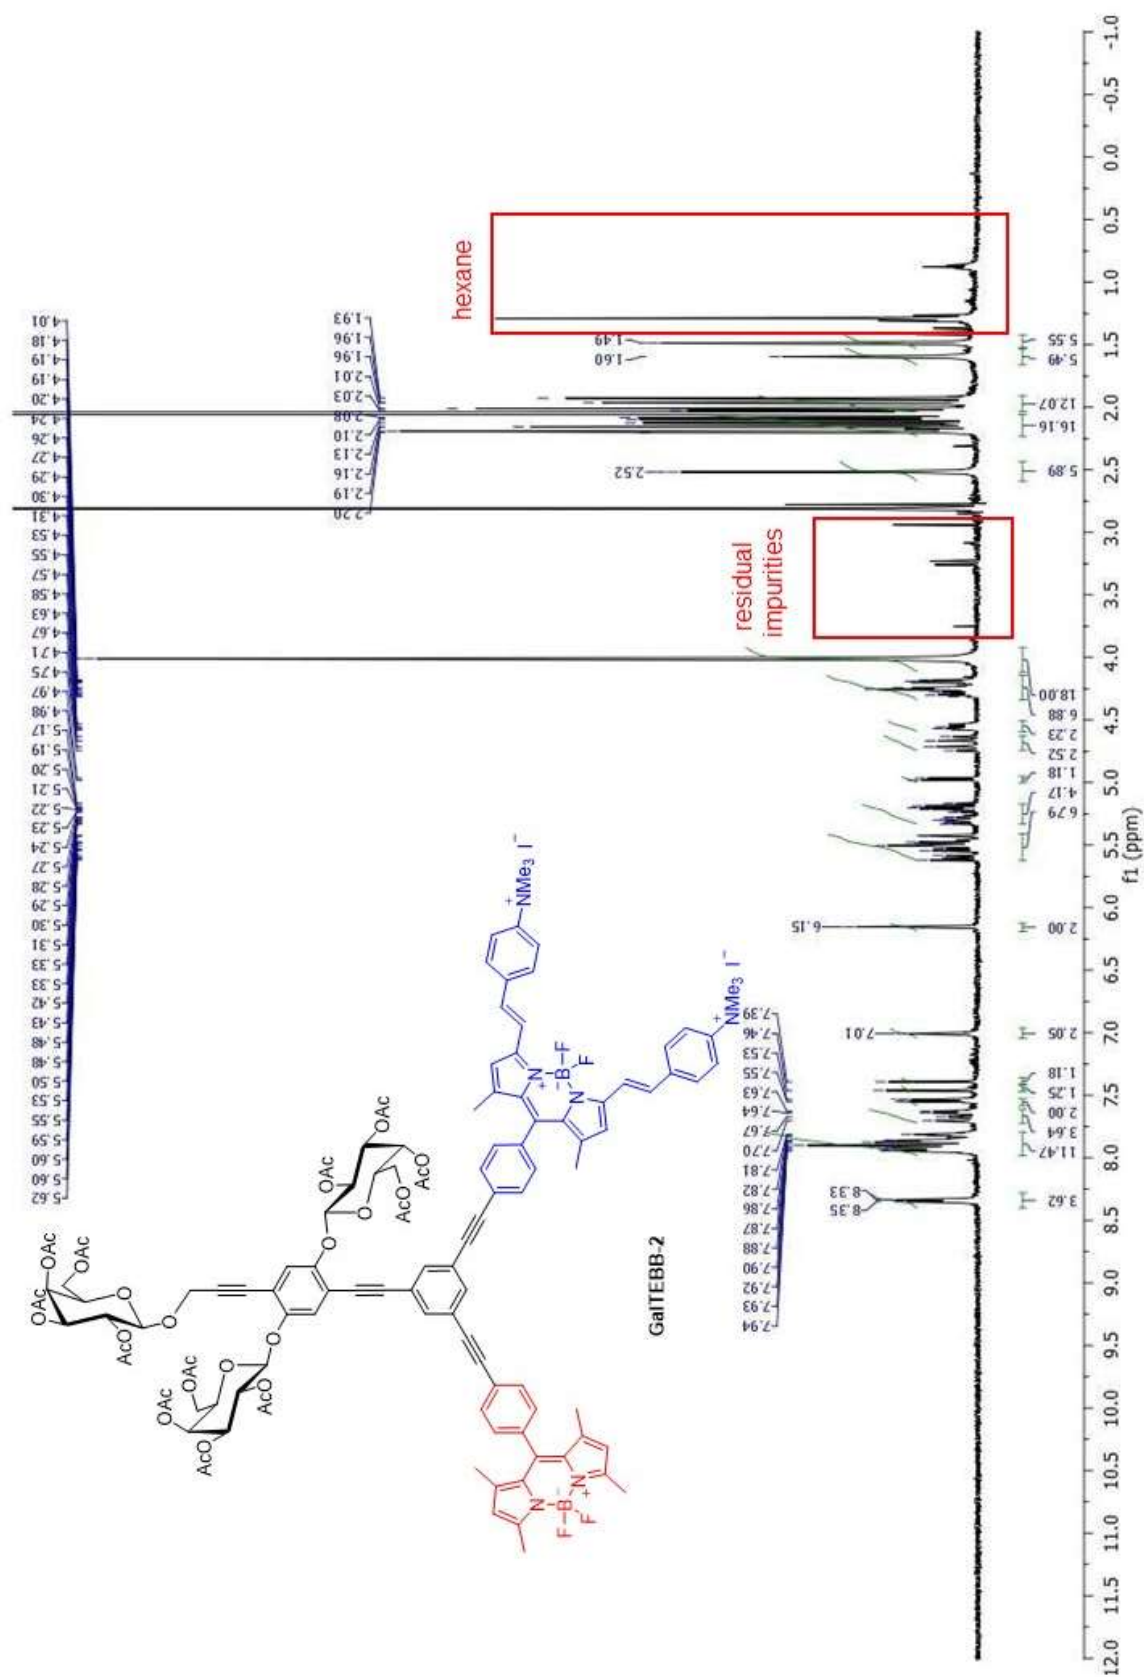

Figure S15.  $^1\text{H}$ -NMR compound **GalTEBB-2** in  $\text{acetone-d}_6$

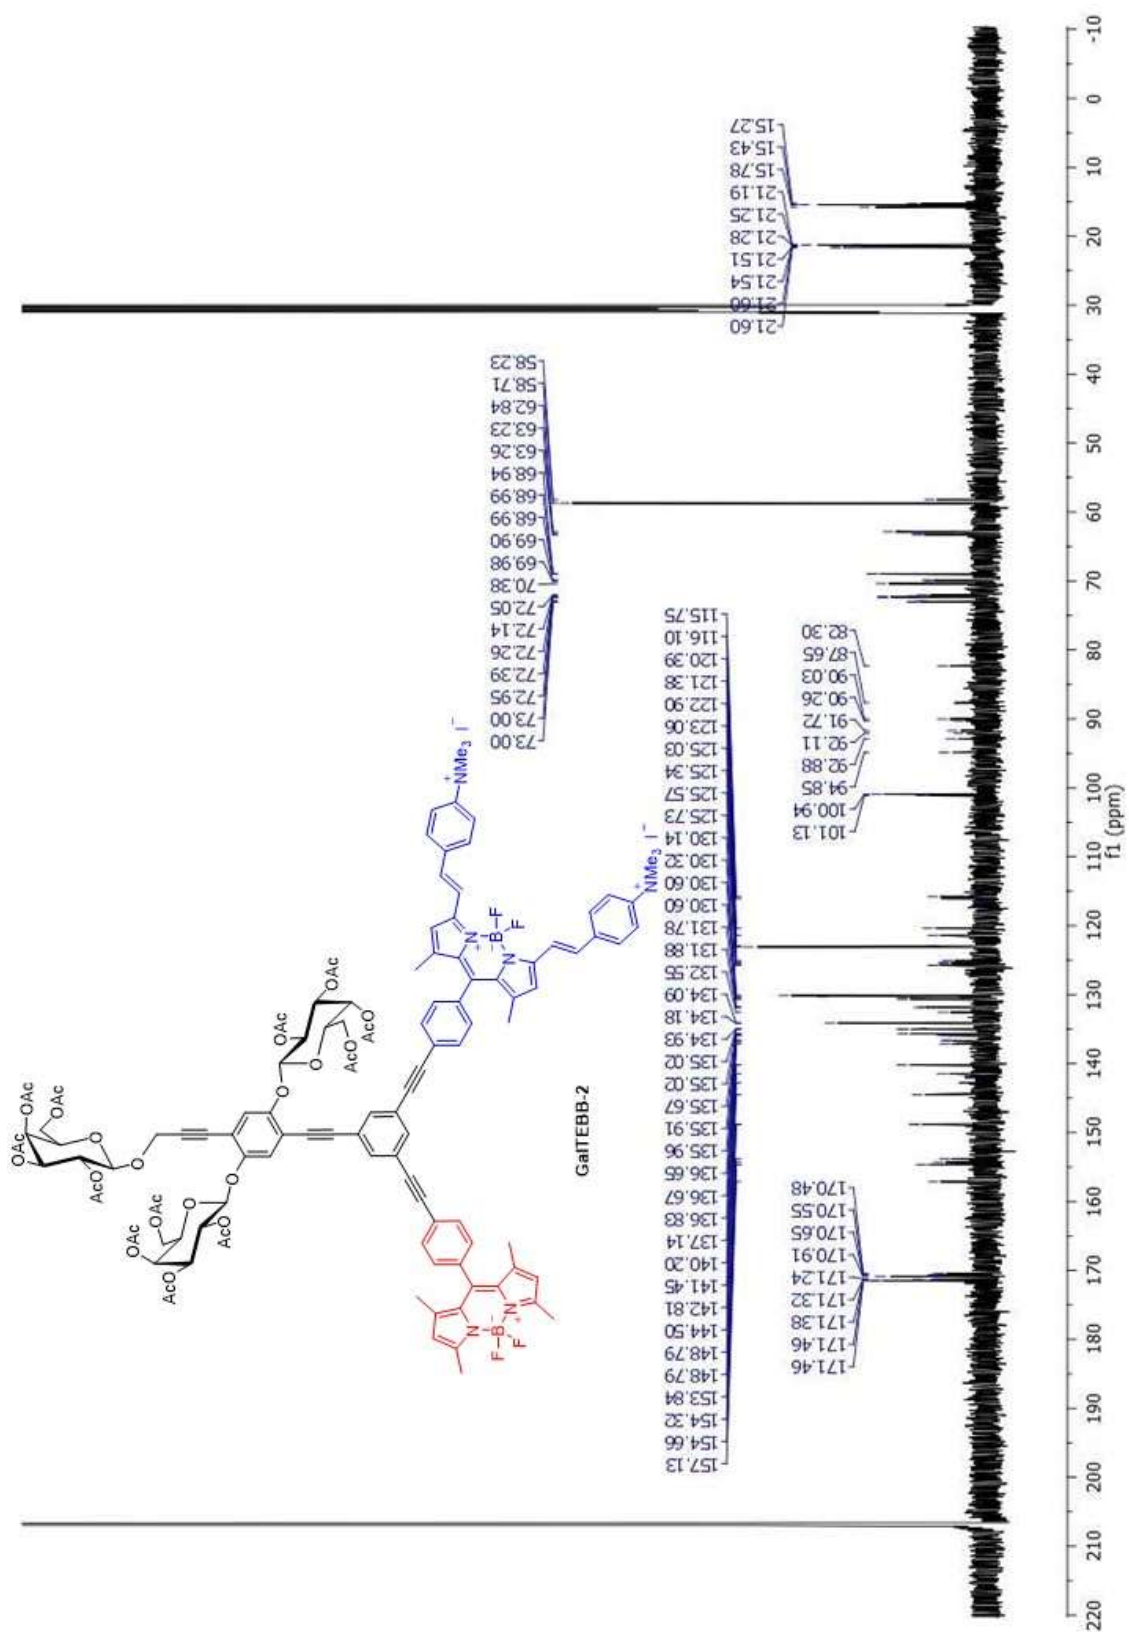

**Figure S16.** <sup>13</sup>C-NMR compound **GalTEBB-2** in acetone-*d*<sub>6</sub>

## 6. References

- [1] Spicer, C. D.; Davis, B. G. *Chem. Commun.* 2013, **49**, 2747-2749.
- [2] Bonaccorsi, P.; Aversa, M. C.; Barattucci, A.; Papalia, T.; Puntoriero, F.; Campagna, S. *Chem. Commun.*, 2012, **48**, 10550-10552.
- [3] Nakamaru, N. *Bull. Chem. Soc. Jpn.*, 1982, **55**, 2697.
- [4] Olmsted III, J. J. *J. Phys. Chem.* 1979, **83**, 2581.
- [5] a) Serra, R.; Grande, R.; Butrico, L.; Rossi, A.; Settimio, U. F.; Caroleo, B.; Amato, B.; Gallelli, L.; de Franciscis, S. *Expert Rev Anti Infect Ther*, 2015, **13**, 605-613. b) Fischer A.J.; Singh S.B.; LaMarche M.M.; Maakestad L.J.; Kienenberger Z.E.; Peña T.A.; Stoltz D.A.; Limoli D.H. *Am J Respir Crit Care Med.*, 2021, **203**, 328-338.
